# 1 Rapid label-free identification of pathogenic bacteria species from a minute quantity

## 2 exploiting three-dimensional quantitative phase imaging and artificial neural network

3 Geon Kim<sup>a,b</sup>, Daewoong Ahn<sup>c</sup>, Minhee Kang<sup>d</sup>, Jinho Park<sup>a,b</sup>, DongHun Ryu<sup>a,b</sup>, YoungJu Jo<sup>a,b,c,j</sup>, Jinyeop Song<sup>a,b,k</sup>,

4 Jea Sung Ryu<sup>e</sup>, Gunho Choi<sup>c</sup>, Hyun Jung Chung<sup>e,f</sup>, Kyuseok Kim<sup>g</sup>, Doo Ryeon Chung<sup>h</sup>, In Young Yoo<sup>i</sup>, Hee Jae

5 Huh<sup>i</sup>, Hyun-seok Min<sup>e</sup>, Nam Yong Lee<sup>i,\*</sup>, and YongKeun Park<sup>a,b,c,\*</sup>

6 <sup>a</sup>Department of Physics, Korea Advanced Institute of Science and Technology (KAIST), Daejeon 34141, Republic  
7 of Korea.

8 <sup>b</sup>KAIST Institute for Health Science and Technology, KAIST, Daejeon 34141, Republic of Korea

9 <sup>c</sup>Tomocube Inc., Daejeon 34109, Republic of Korea.

10 <sup>d</sup>Smart Healthcare & Device Research Center, Samsung Medical Center, Sungkyunkwan University School of  
11 Medicine, Seoul 06351, Republic of Korea.

12 <sup>e</sup>Graduate School of Nanoscience and Technology, KAIST, Daejeon 34141, Republic of Korea.

13 <sup>f</sup>Department of Biological Science, KAIST, Daejeon 34141, Republic of Korea.

14 <sup>g</sup>Department of Emergency Medicine, Bundang CHA Hospital, Gyeonggi-Do 13496, Korea.

15 <sup>h</sup>Division of Infectious Diseases, Department of Internal Medicine, Samsung Medical Center, Sungkyunkwan  
16 University School of Medicine, Seoul 06351, Republic of Korea.

17 <sup>i</sup>Department of Laboratory Medicine, Seoul St. Mary's Hospital, College of Medicine, The Catholic University of  
18 Korea, Seoul 06591, Republic of Korea.

19 <sup>j</sup>Present address: Department of Applied Physics, Stanford University, Stanford, CA 94305, United States

20 <sup>k</sup>Present address: Department of Physics, Massachusetts Institute of Technology, Cambridge, MA 02139, United  
21 States

22 \*Corresponding authors: [micro.lee@samsung.com](mailto:micro.lee@samsung.com) and [yk.park@kaist.ac.kr](mailto:yk.park@kaist.ac.kr)

23

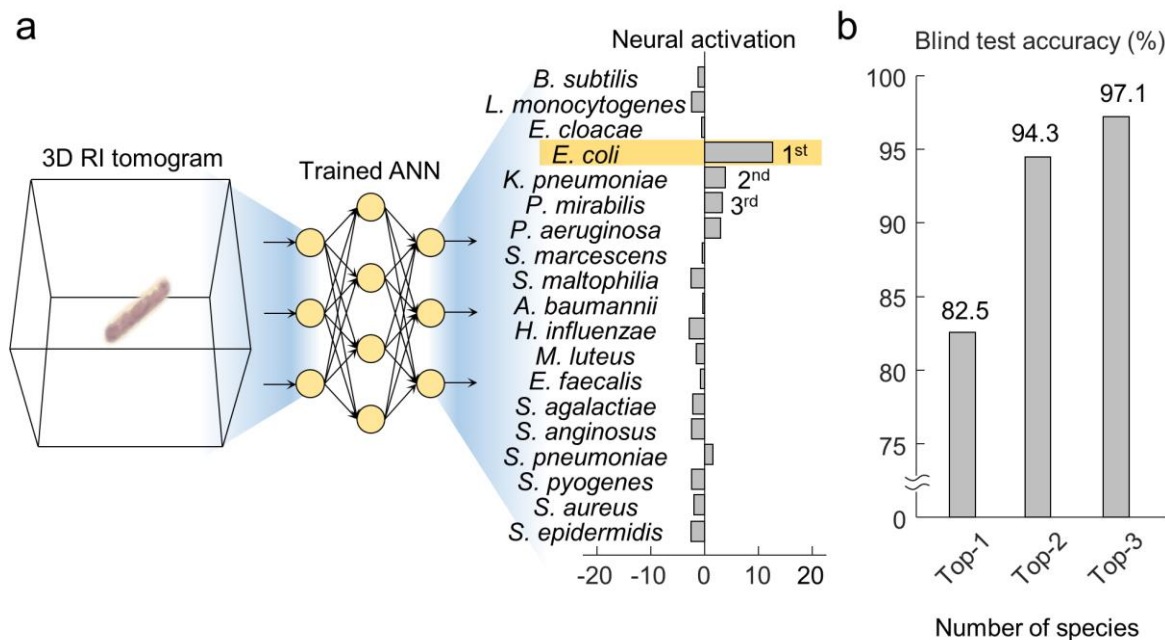

24

25

26 **Abstract**

27 The healthcare industry is in dire need for rapid microbial identification techniques. Microbial infection is a major  
28 healthcare issue with significant prevalence and mortality, which can be treated effectively during the early stages  
29 using appropriate antibiotics. However, determining the appropriate antibiotics for the treatment of the early stages  
30 of infection remains a challenge, mainly due to the lack of rapid microbial identification techniques. Conventional  
31 culture-based identification and matrix-assisted laser desorption/ionization time-of-flight mass spectroscopy are  
32 the gold standard methods, but the sample amplification process is extremely time-consuming. Here, we propose  
33 an identification framework that can be used to measure minute quantities of microbes by incorporating artificial  
34 neural networks with three-dimensional quantitative phase imaging. We aimed to accurately identify the species  
35 of bacterial bloodstream infection pathogens based on a single colony-forming unit of the bacteria. The successful  
36 distinction between a total of 19 species, with the accuracy of 99.9% when ten bacteria were measured, suggests  
37 that our framework can serve as an effective advisory tool for clinicians during the initial antibiotic prescription.

38

39 **Keywords**

40 Artificial neural network; Infectious diseases; Early identification; Quantitative phase imaging; Microbial  
41 identification; Three-dimensional imaging

## 42 1. Introduction

43 Infection by microorganisms is one of the major healthcare issues worldwide, causing a significant number  
44 of casualties and a large amount of healthcare expense. Bacteria notably account for a large portion of life-  
45 threatening infections. During the year 2015, bacterial infections caused 4.4 million deaths, among a total of  
46 8.8 million casualties by infections of any etiology (Hessling et al., 2017). In addition, the cost for treating  
47 bacterial infections accounts for 8.7% of the national health spending in US (Torio and Moore, 2016).

48 The ideal treatment for an infection is the administration of appropriate antibiotics during the early stage.  
49 However, this is not easily implemented in the clinical settings, owing to the difficulty in rapid determination  
50 of the pathogen. Early prescriptions of antibiotics are commonly carried out empirically without the complete  
51 understanding of the etiology, and thus are often imperfect (García, 2009; Peterson et al., 2014) as antibiotics  
52 vary in the efficacy for different pathogens (Hutchings et al., 2019). A systematic review underlines that 46.5%  
53 of sepsis patients were given inappropriate empirical antibiotic treatment and suffered 1.6-fold increased  
54 mortality risk (Paul et al., 2010). Accordingly, a rapid method for identifying the pathogen is required.

55 Conventional phenotypic approaches are time-consuming and often nonspecific, despite being relatively  
56 simple to perform (Bizzini and Greub, 2010). Culture tests, biochemical tests, and microscopic examination  
57 of gram-stained specimens are well-known conventional methods for microbial identification. They require  
58 hours or days of incubation for the metabolic activity or growth to take place. Molecular diagnostic methods  
59 are not scalable because of their process-specific sensitivity and high cost, even though they provide detailed  
60 information (Bizzini and Greub, 2010). Notably, 16S ribosomal RNA sequencing and real-time polymerase  
61 chain reaction offer genetic evidence regarding the identity of the pathogen. While these methods can  
62 precisely screen for a specific pathogen, the effectiveness of detection relies on the experimental setting, such  
63 as the choice of the primer or probe. Along with the relatively high cost, this technical intricacy limits the  
64 applicability of the molecular diagnostic methods.

65 In recent years, matrix-assisted laser desorption/ionization time-of-flight mass spectroscopy (MALDI-TOF  
66 MS) has become the gold standard for microbial identification (Bizzini and Greub, 2010; Seng et al., 2009),  
67 owing to its robust capability to investigate the molecular profile of the specimen. However, MALDI-TOF  
68 MS typically entails a turnaround time above 24 h, since sample amplification must precede to secure a  
69 detectable level of signal (Lin et al., 2018). A previous study indicated that a minimum of  $10^5$  colony-forming  
70 units (CFUs) are required for MALDI-TOF MS-based detection of bacteria (Barreiro et al., 2017). In clinical

71 settings, this quantity is obtained after hours or days of *in vitro* culture, while the mortality risk increases at  
72 an alarming rate (Moehring et al., 2013). Although some studies have sought alternative protocols to reduce  
73 the turnaround time of MALDI-TOF MS (Köck et al., 2017; Lin et al., 2018), the standard time-consuming  
74 protocol remains the most reliable approach.

75 To tackle this challenge of early microbial identification, we exploit quantitative phase imaging (QPI) and  
76 machine-learning-based image classification. Due to the noninvasive nature, QPI has facilitated quantitative  
77 investigations of live cells (Park et al., 2018b). Among various biomedical studies, bacteria has been  
78 investigated with QPI during growth (Ahn et al., 2020; Mir et al., 2011), while optically controlled in the  
79 presence of eukaryotic cells (Kemper et al., 2013), and upon the treatments of antibiotics (Oh et al., 2020). In  
80 recent years, machine learning has been introduced to QPI (Jo et al., 2018; Rivenson et al., 2019b), enabling  
81 diverse applications including virtual staining (Rivenson et al., 2019a), virtual molecular imaging (Jo et al.,  
82 2020; Kandel et al., 2020), improvement of image quality (Kamilov et al., 2015; Ryu et al., 2019; Ryu et al.,  
83 2021), and a variety cell type classification (Chen et al., 2016; Rubin et al., 2019; Siu et al., 2020; Yoon et al.,  
84 2017). One noteworthy study realized efficient screening for anthrax spores using a handheld two-  
85 dimensional (2D) QPI microscope and artificial neural network (ANN) (Jo et al., 2017).

86 Here, we propose an image-based framework for the identification of bacterial species, which is accurate  
87 even for single or a few bacterial cells. We exploit the single-cell profiling ability of (3D) QPI in synergy  
88 with the image recognition power of ANN. Our ANN, that extracts the rich and complex information  
89 delivered by 3D QPI, facilitates accurate identification of bacterial species. The proposed framework was  
90 tested using our laboratory-obtained database of isolates that includes major bloodstream infection (BSI)  
91 pathogens. BSI, which is defined as the presence of microbial pathogens in the bloodstream, is a morbid  
92 disease with a mortality rate of approximately 25% and incidence rate around 200 per 100,000 people  
93 (Bearman and Wenzel, 2005). We demonstrate the species identification from a single or a few cells of BSI  
94 pathogens using our framework, evaluate the performance in multiple perspectives, and deliberate on how to  
95 circumvent the error.

96

## 97 **2. Materials and methods**

### 98 2.1. Preparation of bacteria

99 The bacterial samples were cultured *in vitro* from frozen glycerol stocks. The frozen stock of each species

100 was stored at  $-80^{\circ}\text{C}$  and thawed at room temperature ( $25^{\circ}\text{C}$ ) before use. After thawing, the stock was  
101 inoculated into a liquid medium and stabilized for over an hour in a shaking incubator at  $35^{\circ}\text{C}$ . The stabilized  
102 bacteria were seeded in agar plates containing a suitable medium. The agar plates were incubated at  $35^{\circ}\text{C}$  for  
103 12-24 h until colony growth was visible. A liquid subculture seeded from the agar plate was incubated at  $35^{\circ}\text{C}$   
104 for 8–16 h in a shaking incubator until the medium turned turbid. The subculture solution was diluted with a  
105 liquid medium to a concentration suitable for imaging, then sandwiched between cover glasses. Each species  
106 was inoculated in one of the following media: nutrient agar, brain heart infusion agar, tryptic soy agar, and  
107 chocolate agar. The glycerol stock or subculture was grown in nutrient broth, brain heart infusion broth,  
108 tryptic soy broth, or Giolitti-Cantoni broth.

109

## 110 2.2. Three-dimensional QPI

111 Each 3D refractive index (RI) tomogram was acquired using a commercialized 3D QPI system, also known  
112 as holotomography or optical diffraction tomography (ODT), (HT-2H, Tomocube Inc., Daejeon, Republic of  
113 Korea). The optical components are shown in Fig. 1(a). The system exploits Mach-Zehnder laser  
114 interferometry equipped with a digital micromirror device (DMD). As an optical analogous to X-ray  
115 computed tomography, ODT reconstructs the 3D RI tomogram of a transparent microscopic object from  
116 multiple 2D measurements of holographic images obtained with various illumination angles (Kim et al., 2016;  
117 Wolf, 1969). A continuous-wave laser with a wavelength of 532 nm serves as the light source. Two water-  
118 immersion objective lenses with 1.2 numerical aperture magnifies and de-magnifies the light.

119 The optical phase delay and the amplitude of light are retrieved from the 2D holographic image at each  
120 illumination angle (Fig. 1(b)), resulting in a sinogram of phase delay and amplitude. Here, the DMD alters  
121 the illumination angle by serving as a controllable binary grating (Lee et al., 2017; Shin et al., 2015). Our  
122 measurement scheme involves a total of 49 illumination angles. Once the sample is located in the microscope  
123 field-of-view, the 49 holographic measurements take approximately 0.4 sec. The 3D RI tomogram is  
124 reconstructed from the sinogram by inversely solving the Helmholtz equation followed by an iterative  
125 regularization (Lim et al., 2015) (Fig. 1(c)). The theoretical resolutions of the tomogram is 110 nm in the  
126 horizontal direction and 330 nm in the vertical direction, considering the spatial frequency range of the  
127 imaging system (Park et al., 2018a). Further descriptions regarding the computational details of ODT  
128 including the reconstruction algorithm can be found in previously published literature (Kim et al., 2013; Kim

129 et al., 2016).

130 An individual 3D RI tomogram referred to the distribution of RI in a  $12.8 \mu\text{m} \times 12.8 \mu\text{m} \times 12.8 \mu\text{m}$  volumetric  
131 space, sampled at a voxel resolution of  $100 \text{ nm} \times 100 \text{ nm} \times 200 \text{ nm}$ . Each 3D RI tomogram contained a single  
132 bacterium or several bacteria that were adherent together after fission; we term this quantity a single CFU  
133 henceforth (1) in conformity to the definition of CFU (Hazan et al., 2012; Krieger, 2010) and (2) to connote  
134 the sample quantity required for our framework. A manual inspection of each 3D RI tomogram ensured that  
135 noisy measurements were ruled out before establishing the database.

136

### 137 2.3. Artificial neural network

138 The structure of ANN utilized in this framework mainly consists of 3D convolutional operations which can  
139 effectively explore the 3D structure of 3D RI tomograms. More specifically, the dense connections between  
140 the convolutional operations induce the ANN to revisit the feature maps of the shallower layers even at the  
141 deep layers. Fig. 2 illustrates the structure of our ANN in detail. The structure is inspired by the convolutional  
142 ANN design that outperformed most of the other designs in the benchmark tasks of 2D image analysis (Huang  
143 et al., 2017). The four dense blocks include 12, 24, 64, and 64 convolutional operations, respectively, from  
144 shallow to deep. The number of feature channels after the initial convolution and the growth rate of the feature  
145 channels are 64 and 32, respectively.

146 The ANN was optimized by minimization of the cross-entropy loss between the ground truth and the  
147 prediction. For each species, 40 tomograms were randomly chosen as the blind test dataset and another 40  
148 tomograms were randomly chosen as the validation dataset. The remaining tomograms composed the training  
149 dataset, which were directly reflected in the loss minimization process. The loss that occurred in the training  
150 dataset was reduced using the stochastic gradient descent algorithm. The step size of the stochastic gradient  
151 descent algorithm was scheduled according to the cosine annealing method (Loshchilov and Hutter, 2016) at  
152 an initial step size of 0.001 and a period of 64 epochs. During training, data augmentation took place for each  
153 tomogram, once every epoch, to prevent overfitting of the trained model. The augmentation included  
154 random processes of horizontal crop, horizontal rotation, and Gaussian noise. During the blind test, each input  
155 tomogram was horizontally cropped around the center to provide an identical dimension. These processes  
156 resulted in an input tomogram of  $9.6 \mu\text{m} \times 9.6 \mu\text{m} \times 12.8 \mu\text{m}$  to be fed into the ANN. A single training epoch  
157 through the entire training dataset took approximately 10 min, when using eight graphics processing units of

158 GeForce GTX 1080ti and a central processing unit of Xeon E5-2600. The ANN was trained for 2,000 epochs  
159 while saving models that yielded high training accuracies or validation accuracies. The ANN and the  
160 optimization were implemented using PyTorch 1.0.0.

161 The algorithm for the blind test involved the predictions of multiple best-performing ANN models. Models  
162 with the highest accuracies for the training and validation datasets were chosen and integrated, to exploit a  
163 wider variety of features and prevent model-by-model variance. In search of the optimal strategy for choosing  
164 and integrating multiple models, four relevant parameters were explored. These parameters included the  
165 number of integrated models weighting between the accuracies for the training validation dataset, whether or  
166 not to normalize the neural activation, and the formula for integrating the predictions by the chosen models.  
167 Four options were considered as the formula for integrating the predictions: taking the average, taking the  
168 exponential average, voting, and taking the maximum projection of the neural activation. The combination  
169 of the parameters which yielded the highest validation accuracy established the algorithm for the blind test.

170

### 171 3. Results

172 The key function of our framework is to assess the species of the bacterial pathogen under a quantity of a  
173 single CFU level. 3D QPI and ANN classification can provide preliminary results during the early stages of  
174 infections, whereas the results of gold standard methods will be available dozens of hours later. Incorporation  
175 of our framework into the gold standard routine is practicable since our framework operates with a minute  
176 quantity of bacteria without destroying nor chemically modifying the bacteria.

177

#### 178 3.1. Three-dimensional images of the bacteria

179 A database, which comprised 10,556 3D RI tomograms, was established with 19 different species of BSI  
180 pathogens. The 19 species accounted for around 90% of all BSI-related cases, as indicated by the annual data  
181 from a 1,000-bed tertiary care institute (Opota et al., 2015). The 3D RI tomograms of the 19 species showed  
182 that 3D QPI effectively conveys the microscopic structure of bacteria (Fig. 3). Some characteristic structures  
183 are clearly visible in the 3D RI tomograms, e.g., cellular chains of streptococci. The species and the  
184 corresponding numbers of tomograms are as follows: *Acinetobacter baumannii* (664), *Bacillus subtilis* (515),  
185 *Enterobacter cloacae* (541), *Enterococcus faecalis* (526), *Escherichia coli* (600), *Haemophilus influenzae*  
186 (*511*), *Klebsiella pneumoniae* (525), *Listeria monocytogenes* (632), *Micrococcus luteus* (247), *Proteus*

187 *mirabilis* (517), *Pseudomonas aeruginosa* (596), *Serratia marcescens* (519), *Staphylococcus aureus* (558),  
188 *Staphylococcus epidermidis* (559), *Stenotrophomonas maltophilia* (549), *Streptococcus agalactiae* (537),  
189 *Streptococcus anginosus* (644), *Streptococcus pneumoniae* (566), and *Streptococcus pyogenes* (750).

190

### 191 3.2. Identification with single images

192 The optimized ANN model determined the species from an unseen 3D RI tomogram with an accuracy of 82.5%  
193 in the blind test. Our single-CFU accuracy was comparable to the rate of correct species identification using  
194 MALDI-TOF MS (Drancourt, 2010). During the training, the neural network was prompted to recognize  
195 structural features in the 3D RI tomograms of the training set and relate the features to the species. As a result,  
196 the ANN amplifies the neural activation of the species that share structural features with a blind test tomogram,  
197 whereas it attenuates the neural activation of those that display distinct structural features (Fig. 4(a)). The  
198 species scoring the highest neural activation was chosen as the prediction result.

199 Examinations verified the significant roles of 3D QPI and ANN in achieving species identification at a single  
200 CFU level. 3D QPI presented the 3D structure of bacterial cells in detail, while the ANN extracted the  
201 underlying features from the complex domain of 3D RI tomograms. Our comparative study (Appendix A.1)  
202 showed that neither a 2D QPI measurement nor a multi-angular sinogram of 2D QPI measurements could  
203 reproduce the accuracy of 82.5%. In addition, our ANN outperformed the classification method based on  
204 machine learning and handcrafted features (Yoon et al., 2017) with more than twofold accuracy (Appendix  
205 A.2)

206 The risk of error could be reduced through a broader interpretation of the neural activation. To be precise,  
207 narrowing down a few species that display high neural activation achieved lower rate of missing the correct  
208 species, compared to the single-species prediction. This approach secures additional sensitivity at the cost of  
209 specificity, which is a strategic trade-off. Approximately 94.3% of the blind test data included the correct  
210 species, two of which had the highest values of neural activation. The probability further increased to 97.1%  
211 when considering the top three values of neural activation (Fig. 4(b)). This considerable reduction of error  
212 was due to the robust feature-extracting ability of our ANN; the ANN recognizes the features related to the  
213 correct species, even in the cases of misidentified tomograms.

214

### 215 3.3. Error in species identification



216 To characterize the errors in each species, the blind test results for all 19 species were investigated using the  
217 confusion matrix (Fig. 5(a)). The most frequent errors included misidentification of *Acinetobacter baumannii*  
218 as *Streptococcus pneumoniae*, *Klebsiella pneumoniae* as *Streptococcus pneumoniae*, *Streptococcus*  
219 *agalactiae* as *Staphylococcus aureus*, and *Listeria monocytogenes* as *Bacillus subtilis*. Notably, thick bacilli  
220 and coccobacilli were prone to the misidentification as *Streptococcus pneumoniae*. This tendency is in  
221 agreement to the relatively elongated morphology of *Streptococcus pneumoniae* compared with other species  
222 of cocci (Hoyer et al., 2018; Pathak et al., 2018),

223 The distribution of the species with the second and third highest values of neural activation visualizes the  
224 similarity projected by the ANN (Fig. 5(b)). In this distribution, it is evident that the ANN reflects the  
225 morphological similarities between different species belonging to close categories. For instance, two clusters  
226 representing bacilli and other bacteria can be outlined, whereas the similarity between gram-positive bacilli  
227 further stands out compared with the similarity among all bacilli.

228 Classification tasks referring to the gram-stainability and respiratory metabolism were also carried out,  
229 resulting in accuracies of 94.6% and 94.2%, respectively (Fig. 5(c) and (d)). The higher accuracy of  
230 classification tasks compared with species identification indicates that the proposed framework can be  
231 conducted with higher certainty in broader categories.

232

### 233 3.4. Identification with multiple images

234 The accuracy of species identification significantly increased when multiple 3D RI tomograms were reflected  
235 in the prediction. The neural activation averaged over the inferences of multiple tomograms displayed a high  
236 probability to indicate the correct species, even for cases where most individual tomograms were  
237 misidentified (Fig. 6(a)). The error rate dropped more sharply than a simple reciprocal function of the number  
238 of tomograms; 94.9% and 98.4% accuracy was achieved, respectively using two and three 3D RI tomograms  
239 (Fig. 6(b)). This dramatic gain in accuracy was attributable to the robustness of the trained ANN in extracting  
240 species-related features, which was described in Section 3.2. In addition, a quantitative analysis underpinned  
241 that the correct predictions were made with higher contrasts in the neural activation compared to the  
242 mispredictions (Appendix A.3). This analysis explained how the averaging process selectively promotes  
243 correct predictions while flattening the erroneous signals in the neural activation.

244

#### 245 4. Discussion

246 We propose a framework for species identification of bacterial pathogens at a single CFU level using 3D QPI  
247 and ANN. The exceptionally high accuracy under a limited sample quantity is attributable to the remarkable  
248 single-cell profiling ability of 3D QPI and the feature-extracting ability of ANN. Results show that the ample  
249 species-related features in a 3D RI tomogram are robustly extracted by the trained ANN, overcoming the  
250 quantity requirement of the previous methods.

251 We believe that the proposed framework will efficiently refine the initial antibiotics prescribed in the clinical  
252 settings. Our species identification accuracy based on a single CFU of bacteria is comparable to the  
253 performance of MALDI-TOF MS in identifying the species of blood-born pathogens (Drancourt, 2010). The  
254 risk of misidentification by our framework can be suppressed by taking multiple species into consideration.  
255 The risk of missing the correct pathogen dramatically dropped when two or three most likely species were  
256 selected. Our framework is also capable of being flexibly tuned for broader categories of bacteria such as  
257 gram-stainability or aerobicity. Even though these categories are not as specific as species, they can play a  
258 vital role in guiding antibiotic prescriptions. For instance, gram-positive pathogens can be effectively treated  
259 with vancomycin, whereas the gram-stainability can be determined by a destructive staining of sufficient  
260 sample. In addition, the accuracy of our framework can sharply increase through additional measurements of  
261 3D RI tomograms. This signifies that our framework can be more accurate depending on the available sample  
262 quantity, compared to the baseline of the single-CFU performance. Furthermore, this framework can be  
263 incorporated along with the routine methods of microbial identification, including MALDI-TOF MS. The  
264 high performance at a minute sample quantity and the noninvasive property allow our framework to be added  
265 without exhausting the limited quantity of the sample.

266 Future studies on sample processing will propel our framework towards more immediate use. A condition  
267 suitable for imaging bacteria has to be met to perform our single-CFU level identification. For blood samples,  
268 this condition is achieved by performing lysis centrifugation after the initial blood culture (Kirn and Weinstein,  
269 2013). However, application of our framework before completion of the blood culture is possible if a high-  
270 throughput procedure for enrichment of bacteria is introduced. A prominent and practical technique is the  
271 selective collection of particles utilizing advanced fluidic systems (Balyan et al., 2020; Kuntaegowdanahalli  
272 et al., 2009; Lee et al., 2019; Lei et al., 2012). Bacteria have also been prominent targets of collection using  
273 fluidic systems (D'Amico et al., 2017; Jung et al., 2020). The adoption of these strategies will facilitate the

274 identification of the pathogen earlier than that suggested in our demonstration.  
275 Moreover, validation using a larger diversity of pathogens will provide insights into the scope of application.  
276 We expect the proposed framework to be applicable to pathogens causing different classes of infections, such  
277 as urinary tract infections and lower respiratory infections, which are partially covered in this study. In  
278 addition, it is yet to be assessed whether the framework is capable of distinguishing strains resistant to  
279 antibiotics. The emergence of drug-resistant strains has compromised the established convention of antibiotic  
280 prescription, and the need to screen out resistant strains has also been highlighted (Chamieh et al., 2020;  
281 Hutchings et al., 2019; Shariati et al., 2020). Investigating the performance in identifying bacterial strains and  
282 ensuring a higher accuracy to screening resistant strains will be crucial for improving the proposed framework.

283

## 284 **5. Conclusion**

285 To the best of our knowledge, our study demonstrates an unprecedented distinction of live and unmodified  
286 bacteria at a single CFU level among a wide range of species. With a single measurement of a bacterium or a  
287 CFU, we achieved the blind test accuracy of 82.5%, 94.6%, and 94.2% for species, gram-stainability, and  
288 aerobicity, respectively. With ten individual measurements, we achieved, the blind test accuracy of 99.9%,  
289 98.9%, and 99.9% for species, gram-stainability, and aerobicity, respectively. Our accuracy based on a single  
290 measurement, which is comparable to the identification rate of MALDI-TOF MS, is facilitated by the precise  
291 3D measurement of bacteria through 3D QPI and the statistical utilization of the measurement through ANN.  
292 We believe that the proposed framework will substantially augment the early countermeasures against  
293 bacterial infections; identifying the pathogen without the delay of sample amplification can provide a shortcut  
294 for administering the appropriate antibiotics. We note that, in principle, the application of our framework can  
295 be brought forward to briefly after the sample collection if integrated with an advanced sample processing  
296 techniques.

297

298

## 299 **Appendix A**

### 300 **A.1. Suitability of 3D QPI for species identification of bacteria**

301 The benefit of 3D QPI in identification of bacteria at single CFU level was verified in a comparative  
302 experiment. Our proposed framework was compared with two other approaches utilizing the 2D equivalent

303 of our 3D ANN structure. One approach is trained to identify the species from 2D amplitude and phase delay  
304 maps, while the other is trained to identify the species from the sinogram composed of 2D amplitude and  
305 phase delay maps in multiple illumination angles. The approaches based on 2D and sinogram data achieved  
306 67.6% and 68.0% blind-test accuracy respectively after training and model incorporation identical to that of  
307 the 3D ANN (Fig. A.1). The significant difference in the accuracy suggests that 3D holographic microscope  
308 offers features to ANN in a more ostensive manner.

309

#### 310 A.2. Suitability of ANN for classification of 3D RI tomograms

311 The performance of ANN in recognizing the 3D RI tomograms of bacteria was compared to that of a  
312 conventional machine learning approach. For the comparison we apply the strategy of threshold-derived  
313 feature extraction and run  $k$ -nearest neighbors ( $k$ -NN) classifications based on the extracted features, that is,  
314 an approach that had effectively classified 3D RI tomograms of lymphocytes (Yoon et al., 2017) (Fig. A.2(a)).  
315 Scanning the values of  $k$  from 1 to 40, the lowest and the highest accuracies of the  $k$ -NN were 27.4% and  
316 32.2% for  $k = 2$  and  $k = 30$  respectively (Fig. A.2(b)). As specified from the comparison, our implementation  
317 of ANN was more capable of recognizing species-related characteristics, compared to the machine learning  
318 with handcrafted features.

319

#### 320 A.3. Contrast of neural activation

321 The dramatic rise of identification accuracy based on multiple 3D RI tomograms was accounted for by the  
322 feature-extracting ability of the ANN. A tendency appearing in the neural activation displays how the  
323 prediction significantly benefits from multiple tomograms. The contrast of neural activation, defined as the  
324 highest activation value divided by the sum of all other positive activation values (Fig. A.3(a)), was  
325 significantly higher in the correctly identified cases than the misidentified cases (Fig. A.3(b)). The difference  
326 displays how taking the average of neural activation from multiple 3D RI tomograms elevates the correct  
327 element of the neural activation.

328

#### 329 **Acknowledgements**

330 Y. Jo acknowledges support from KAIST Presidential Fellowship and Asan Foundation Biomedical Science  
331 Scholarship. The authors thank Ms. Hyeonjung Kim (The.Wave.Talk) for providing sample preparation

332 protocols and agents. The clinical isolates were obtained from Asian Bacterial Bank of the Asia Pacific  
333 Foundation for Infectious Diseases.

334

### 335 **Funding**

336 This work was supported by KAIST Up Program, BK21+ program, Tomocube, and National Research  
337 Foundation of Korea (2017M3C1A3013923, 2015R1A3A2066550, 2018K000396), and Institute of  
338 Information & communications Technology Planning & Evaluation (IITP) grant funded by the Korea  
339 government (MSIT) (2021-0-00745).

340

### 341 **Conflicts of interest**

342 Mr. Daewoong Ahn, Mr. Gunho Choi, Dr. Hyun-Seok Min, and Prof. YongKeun Park have financial interests  
343 in Tomocube Inc., a company that commercializes optical diffraction tomography and quantitative phase  
344 imaging instruments and is one of the sponsors of the work.

345

### 346 **Author contributions**

347 G.K., Y.J. and Y.P. conceived and designed the research. G.K., M.K., J.P., J.S., and J.S.R. conducted the  
348 experiments. G.K., D.A., G.C., and H.M. analyzed the data. G.K., Y.J., D.R., H.J.C., K.K., D.R.C., I.Y.Y,  
349 H.J.H, H.M., N.Y.L., and Y.P. prepared the manuscript. All authors read and discussed the results.

350

351 **References**

352

- 353 Ahn, J.H., Seo, H., Park, W., Seok, J., Lee, J.A., Kim, W.J., Kim, G.B., Kim, K.-J., Lee, S.Y.,  
354 2020. Enhanced succinic acid production by *Mannheimia* employing optimal malate  
355 dehydrogenase. *Nature communications* 11, 1-12.
- 356 Balyan, P., Saini, D., Das, S., Kumar, D., Agarwal, A., 2020. Flow induced particle separation  
357 and collection through linear array pillar microfluidics device. *Biomicrofluidics* 14, 024103.
- 358 Barreiro, J.R., Gonçalves, J.L., Braga, P.A.C., Dibbern, A.G., Eberlin, M.N., Dos Santos, M.V.,  
359 2017. Non-culture-based identification of mastitis-causing bacteria by MALDI-TOF mass  
360 spectrometry. *Journal of dairy science* 100, 2928-2934.
- 361 Bearman, G.M., Wenzel, R.P., 2005. Bacteremias: a leading cause of death. *Archives of*  
362 *medical research* 36, 646-659.
- 363 Bizzini, A., Greub, G., 2010. Matrix-assisted laser desorption ionization time-of-flight mass  
364 spectrometry, a revolution in clinical microbial identification. *Clinical Microbiology and*  
365 *infection* 16, 1614-1619.
- 366 Chamieh, A., El-Hajj, G., Zmerli, O., Afif, C., Azar, E., 2020. Carbapenem resistant organisms:  
367 A 9-year surveillance and trends at Saint George University Medical Center. *Journal of*  
368 *infection and public health* 13, 2101-2106.
- 369 Chen, C.L., Mahjoubfar, A., Tai, L.-C., Blaby, I.K., Huang, A., Niazi, K.R., Jalali, B., 2016.  
370 Deep learning in label-free cell classification. *Scientific reports* 6, 1-16.
- 371 D'Amico, L., Ajami, N., Adachi, J., Gascoyne, P., Petrosino, J., 2017. Isolation and  
372 concentration of bacteria from blood using microfluidic membraneless dialysis and  
373 dielectrophoresis. *Lab on a Chip* 17, 1340-1348.
- 374 Drancourt, M., 2010. Detection of microorganisms in blood specimens using matrix-assisted  
375 laser desorption ionization time-of-flight mass spectrometry: a review. *Clinical Microbiology*  
376 *and Infection* 16, 1620-1625.
- 377 García, M.S., 2009. Early antibiotic treatment failure. *International journal of antimicrobial*  
378 *agents* 34, S14-S19.
- 379 Hazan, R., Que, Y.-A., Maura, D., Rahme, L.G., 2012. A method for high throughput  
380 determination of viable bacteria cell counts in 96-well plates. *BMC microbiology* 12, 1-7.
- 381 Hessling, M., Feiertag, J., Hoenes, K., 2017. Pathogens provoking most deaths worldwide.  
382 *Biosci. Biotechnol. Res. Commun* 10, 1-7.
- 383 Hoyer, J., Bartel, J., Gómez-Mejía, A., Rohde, M., Hirschfeld, C., Heß, N., Sura, T., Maaß, S.,  
384 Hammerschmidt, S., Becher, D., 2018. Proteomic response of *Streptococcus pneumoniae* to  
385 iron limitation. *International Journal of Medical Microbiology* 308, 713-721.
- 386 Huang, G., Liu, Z., Van Der Maaten, L., Weinberger, K.Q., 2017. Densely connected  
387 convolutional networks, *Proceedings of the IEEE conference on computer vision and pattern*  
388 *recognition*, pp. 4700-4708.
- 389 Hutchings, M.I., Truman, A.W., Wilkinson, B., 2019. Antibiotics: past, present and future.  
390 *Current opinion in microbiology* 51, 72-80.
- 391 Jo, Y., Cho, H., Lee, S.Y., Choi, G., Kim, G., Min, H.-s., Park, Y., 2018. Quantitative phase  
392 imaging and artificial intelligence: a review. *IEEE Journal of Selected Topics in Quantum*  
393 *Electronics* 25, 1-14.
- 394 Jo, Y., Cho, H., Park, W.S., Kim, G., Ryu, D., Kim, Y.S., Lee, M., Joo, H., Jo, H., Lee, S., 2020.  
395 Data-driven multiplexed microtomography of endogenous subcellular dynamics. *bioRxiv*.
- 396 Jo, Y., Park, S., Jung, J., Yoon, J., Joo, H., Kim, M.-h., Kang, S.-J., Choi, M.C., Lee, S.Y., Park,

- 397 Y., 2017. Holographic deep learning for rapid optical screening of anthrax spores. *Science*  
398 *advances* 3, e1700606.
- 399 Jung, T., Jung, Y., Ahn, J., Yang, S., 2020. Continuous, rapid concentration of foodborne  
400 bacteria (*Staphylococcus aureus*, *Salmonella typhimurium*, and *Listeria monocytogenes*) using  
401 magnetophoresis-based microfluidic device. *Food Control* 114, 107229.
- 402 Kamilov, U.S., Papadopoulos, I.N., Shoreh, M.H., Goy, A., Vonesch, C., Unser, M., Psaltis, D.,  
403 2015. Learning approach to optical tomography. *Optica* 2, 517-522.
- 404 Kandel, M.E., He, Y.R., Lee, Y.J., Chen, T.H.-Y., Sullivan, K.M., Aydin, O., Saif, M.T.A., Kong,  
405 H., Sobh, N., Popescu, G., 2020. Phase Imaging with Computational Specificity (PICS) for  
406 measuring dry mass changes in sub-cellular compartments. *Nature communications* 11, 1-10.
- 407 Kemper, B., Barroso, Á., Woerdemann, M., Dewenter, L., Vollmer, A., Schubert, R., Mellmann,  
408 A., von Bally, G., Denz, C., 2013. Towards 3D modelling and imaging of infection scenarios  
409 at the single cell level using holographic optical tweezers and digital holographic microscopy.  
410 *Journal of biophotonics* 6, 260-266.
- 411 Kim, K., Yoon, H., Diez-Silva, M., Dao, M., Dasari, R.R., Park, Y., 2013. High-resolution  
412 three-dimensional imaging of red blood cells parasitized by *Plasmodium falciparum* and in situ  
413 hemozoin crystals using optical diffraction tomography. *Journal of biomedical optics* 19,  
414 011005.
- 415 Kim, K., Yoon, J., Shin, S., Lee, S., Yang, S.-A., Park, Y., 2016. Optical diffraction tomography  
416 techniques for the study of cell pathophysiology. *Journal of Biomedical Photonics &*  
417 *Engineering* 2.
- 418 Kirn, T., Weinstein, M., 2013. Update on blood cultures: how to obtain, process, report, and  
419 interpret. *Clinical Microbiology and Infection* 19, 513-520.
- 420 Köck, R., Wüllenweber, J., Horn, D., Lanckohr, C., Becker, K., Idelevich, E.A., 2017.  
421 Implementation of short incubation MALDI-TOF MS identification from positive blood  
422 cultures in routine diagnostics and effects on empiric antimicrobial therapy. *Antimicrobial*  
423 *Resistance & Infection Control* 6, 1-7.
- 424 Krieger, R., 2010. Hayes' handbook of pesticide toxicology. Academic press.
- 425 Kuntaegowdanahalli, S.S., Bhagat, A.A.S., Kumar, G., Papautsky, I., 2009. Inertial  
426 microfluidics for continuous particle separation in spiral microchannels. *Lab on a Chip* 9, 2973-  
427 2980.
- 428 Lee, K., Kim, K., Kim, G., Shin, S., Park, Y., 2017. Time-multiplexed structured illumination  
429 using a DMD for optical diffraction tomography. *Optics letters* 42, 999-1002.
- 430 Lee, S., Park, S., Kim, W., Moon, S., Kim, H.-Y., Lee, H., Kim, S.J., 2019. Nanoelectrokinetic  
431 bufferchannel-less radial preconcentrator and online extractor by tunable ion depletion layer.  
432 *Biomicrofluidics* 13, 034113.
- 433 Lei, H., Zhang, Y., Li, B., 2012. Particle separation in fluidic flow by optical fiber. *Optics*  
434 *express* 20, 1292-1300.
- 435 Lim, J., Lee, K., Jin, K.H., Shin, S., Lee, S., Park, Y., Ye, J.C., 2015. Comparative study of  
436 iterative reconstruction algorithms for missing cone problems in optical diffraction tomography.  
437 *Optics express* 23, 16933-16948.
- 438 Lin, J.-F., Ge, M.-C., Liu, T.-P., Chang, S.-C., Lu, J.-J., 2018. A simple method for rapid  
439 microbial identification from positive monomicrobial blood culture bottles through matrix-  
440 assisted laser desorption ionization time-of-flight mass spectrometry. *Journal of microbiology,*  
441 *immunology and infection* 51, 659-665.
- 442 Loshchilov, I., Hutter, F., 2016. Sgdr: Stochastic gradient descent with warm restarts. arXiv  
443 preprint arXiv:1608.03983.

- 444 Mir, M., Wang, Z., Shen, Z., Bednarz, M., Bashir, R., Golding, I., Prasanth, S.G., Popescu, G.,  
445 2011. Optical measurement of cycle-dependent cell growth. *Proceedings of the National*  
446 *Academy of Sciences* 108, 13124-13129.
- 447 Moehring, R.W., Sloane, R., Chen, L.F., Smathers, E.C., Schmader, K.E., Fowler Jr, V.G.,  
448 Weber, D.J., Sexton, D.J., Anderson, D.J., 2013. Delays in appropriate antibiotic therapy for  
449 gram-negative bloodstream infections: a multicenter, community hospital study. *PloS one* 8,  
450 e76225.
- 451 Oh, J., Ryu, J.S., Lee, M., Jung, J., Han, S., Chung, H.J., Park, Y., 2020. Three-dimensional  
452 label-free observation of individual bacteria upon antibiotic treatment using optical diffraction  
453 tomography. *Biomedical optics express* 11, 1257-1267.
- 454 Opota, O., Croxatto, A., Prod'homme, G., Greub, G., 2015. Blood culture-based diagnosis of  
455 bacteraemia: state of the art. *Clinical Microbiology and Infection* 21, 313-322.
- 456 Park, C., Shin, S., Park, Y., 2018a. Generalized quantification of three-dimensional resolution  
457 in optical diffraction tomography using the projection of maximal spatial bandwidths. *JOSA A*  
458 35, 1891-1898.
- 459 Park, Y., Depeursinge, C., Popescu, G., 2018b. Quantitative phase imaging in biomedicine.  
460 *Nature photonics* 12, 578-589.
- 461 Pathak, A., Bergstrand, J., Sender, V., Spelmink, L., Aschtgen, M.-S., Muschiol, S., Widengren,  
462 J., Henriques-Normark, B., 2018. Factor H binding proteins protect division septa on  
463 encapsulated *Streptococcus pneumoniae* against complement C3b deposition and amplification.  
464 *Nature communications* 9, 1-16.
- 465 Paul, M., Shani, V., Muchtar, E., Kariv, G., Robenshtok, E., Leibovici, L., 2010. Systematic  
466 review and meta-analysis of the efficacy of appropriate empiric antibiotic therapy for sepsis.  
467 *Antimicrobial agents and chemotherapy* 54, 4851-4863.
- 468 Peterson, D., McLeod, S., Woolfrey, K., McRae, A., 2014. Predictors of failure of empiric  
469 outpatient antibiotic therapy in emergency department patients with uncomplicated cellulitis.  
470 *Academic Emergency Medicine* 21, 526-531.
- 471 Rivenson, Y., Wang, H., Wei, Z., de Haan, K., Zhang, Y., Wu, Y., Günaydin, H., Zuckerman,  
472 J.E., Chong, T., Sisk, A.E., 2019a. Virtual histological staining of unlabelled tissue-  
473 autofluorescence images via deep learning. *Nature biomedical engineering* 3, 466-477.
- 474 Rivenson, Y., Wu, Y., Ozcan, A., 2019b. Deep learning in holography and coherent imaging.  
475 *Light: Science & Applications* 8, 1-8.
- 476 Rubin, M., Stein, O., Turko, N.A., Nygate, Y., Roitshtain, D., Karako, L., Barnea, I., Giryas,  
477 R., Shaked, N.T., 2019. TOP-GAN: Stain-free cancer cell classification using deep learning  
478 with a small training set. *Medical image analysis* 57, 176-185.
- 479 Ryu, D., Jo, Y., Yoo, J., Chang, T., Ahn, D., Kim, Y.S., Kim, G., Min, H.-S., Park, Y., 2019.  
480 Deep learning-based optical field screening for robust optical diffraction tomography.  
481 *Scientific reports* 9, 1-9.
- 482 Ryu, D., Ryu, D., Baek, Y., Cho, H., Kim, G., Kim, Y.S., Lee, Y., Kim, Y., Ye, J.C., Min, H.-S.,  
483 2021. DeepRegularizer: rapid resolution enhancement of tomographic imaging using deep  
484 learning. *IEEE Transactions on Medical Imaging* 40, 1508-1518.
- 485 Seng, P., Drancourt, M., Gouriet, F., La Scola, B., Fournier, P.-E., Rolain, J.M., Raoult, D.,  
486 2009. Ongoing revolution in bacteriology: routine identification of bacteria by matrix-assisted  
487 laser desorption ionization time-of-flight mass spectrometry. *Clinical Infectious Diseases* 49,  
488 543-551.
- 489 Shariati, A., Dadashi, M., Moghadam, M.T., van Belkum, A., Yaslianifard, S., Darban-  
490 Sarokhalil, D., 2020. Global prevalence and distribution of vancomycin resistant, vancomycin



491 intermediate and heterogeneously vancomycin intermediate Staphylococcus aureus clinical  
492 isolates: a systematic review and meta-analysis. *Scientific reports* 10, 1-16.  
493 Shin, S., Kim, K., Yoon, J., Park, Y., 2015. Active illumination using a digital micromirror  
494 device for quantitative phase imaging. *Optics letters* 40, 5407-5410.  
495 Siu, D.M., Lee, K.C., Lo, M.C., Stassen, S.V., Wang, M., Zhang, I.Z., So, H.K., Chan, G.C.,  
496 Cheah, K.S., Wong, K.K., 2020. Deep-learning-assisted biophysical imaging cytometry at  
497 massive throughput delineates cell population heterogeneity. *Lab on a Chip* 20, 3696-3708.  
498 Torio, C.M., Moore, B.J., 2016. National inpatient hospital costs: the most expensive  
499 conditions by payer, 2013: statistical brief# 204.  
500 Wolf, E., 1969. Three-dimensional structure determination of semi-transparent objects from  
501 holographic data. *Optics communications* 1, 153-156.  
502 Yoon, J., Jo, Y., Kim, M.-h., Kim, K., Lee, S., Kang, S.-J., Park, Y., 2017. Identification of non-  
503 activated lymphocytes using three-dimensional refractive index tomography and machine  
504 learning. *Scientific reports* 7, 1-10.

505

506

507 **Figure**

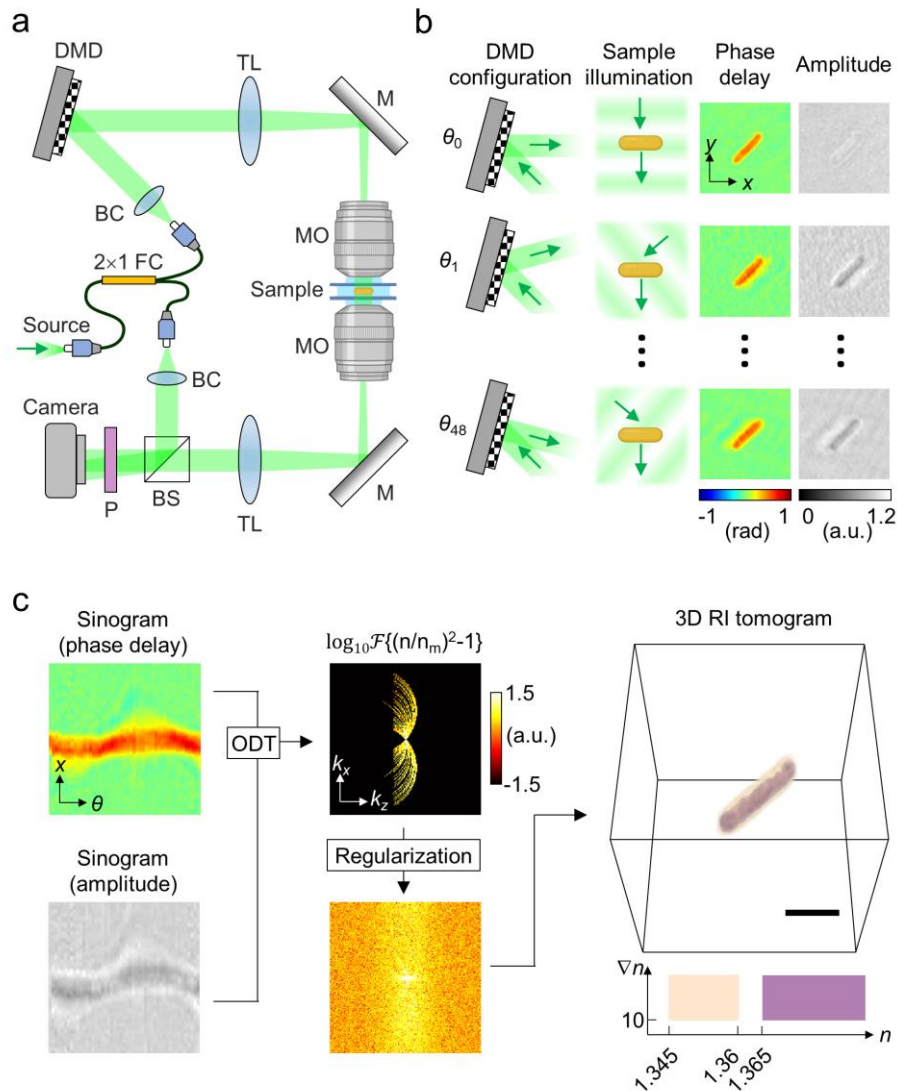

508

509 **Fig. 1. Three-dimensional quantitative phase imaging of bacteria.**

510 (A) The optical system is based on a simplified Mach-Zehnder interferometer. The incident angle of the light  
 511 illuminated into the sample is controlled using the digital micromirror device, that is, utilizing the +1st order beam  
 512 diffracted by the grating pattern on the DMD. BC: beam collimator, BS: beam splitter, CL: condenser lens, DMD:  
 513 digital micromirror device, FC: fiber coupler, LP: linear polarizer, OL: objective lens, TL: tube lens. (B)  
 514 Holograms including both the phase delay and the amplitude is measured while altering the illumination angle  
 515 using the DMD. (C) The three-dimensional RI tomogram is acquired by integrating the sinogram into the  
 516 scattering potential via optical diffraction tomography, followed by an iterative regularization.

517

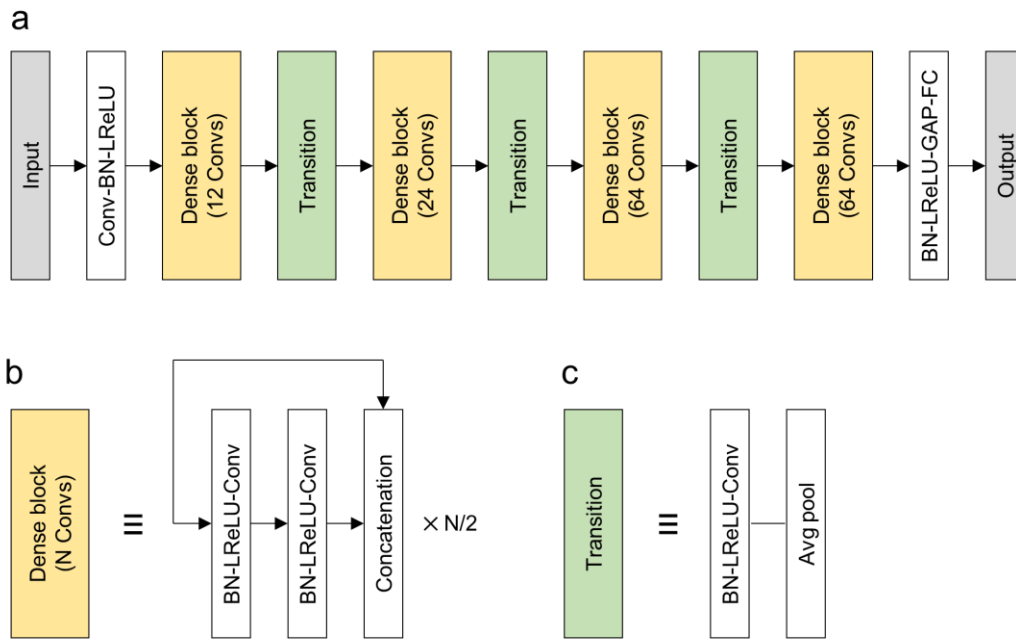

518

519 **Fig. 2. Structure of the artificial neural network.**

520 (A) The structure can be represented with four dense block transition units between adjacent dense blocks. Other  
 521 elements include initial three-dimensional convolutional operation (Conv) of  $3 \times 3 \times 3$  kernels and a stride of  $2 \times$   
 522  $2 \times 2$ , batch normalization, leaky rectified linear units, global average pooling, and fully connected operation. (B)  
 523 The structure of the dense blocks allows features of shallower layers to be revisited in deeper layers. A dense  
 524 block consists of a pair of Convs followed by concatenation of the feature map before the two Convs. In each pair  
 525 of Convs, the first one has  $1 \times 1 \times 1$  kernels, and the second one has  $2 \times 2 \times 2$  kernels; meanwhile, the stride is  $1$   
 526  $\times 1 \times 1$  for both Convs. (c) The transition units shift the scale of the feature extracted by convolution. The Conv  
 527 in each transition unit has  $1 \times 1 \times 1$  kernels and  $1 \times 1 \times 1$  stride.

528

529

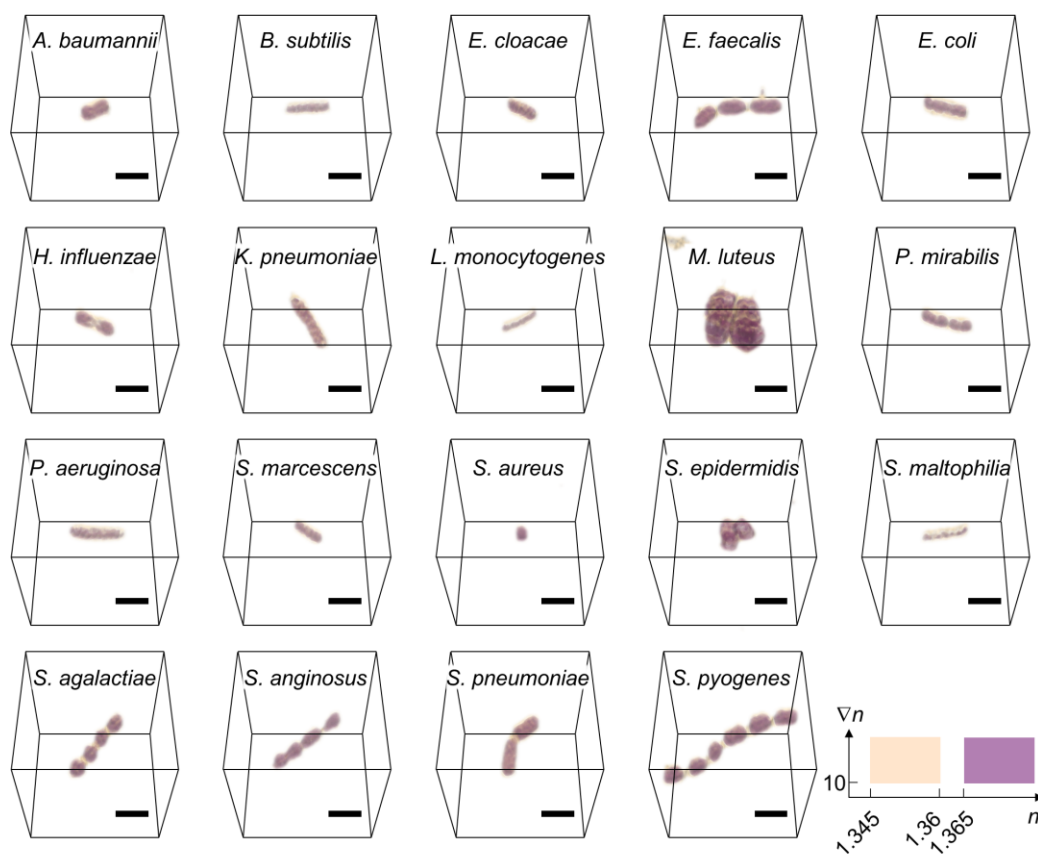

530

531 **Fig. 3. Three-dimensional refractive index tomograms of bacterial bloodstream infection pathogens.**

532 Representative tomograms addressed in our study are rendered in three dimensions. Each tomogram represents  
533 an individual species of bacterial pathogens. Scalebar = 2 $\mu$ m

534

535

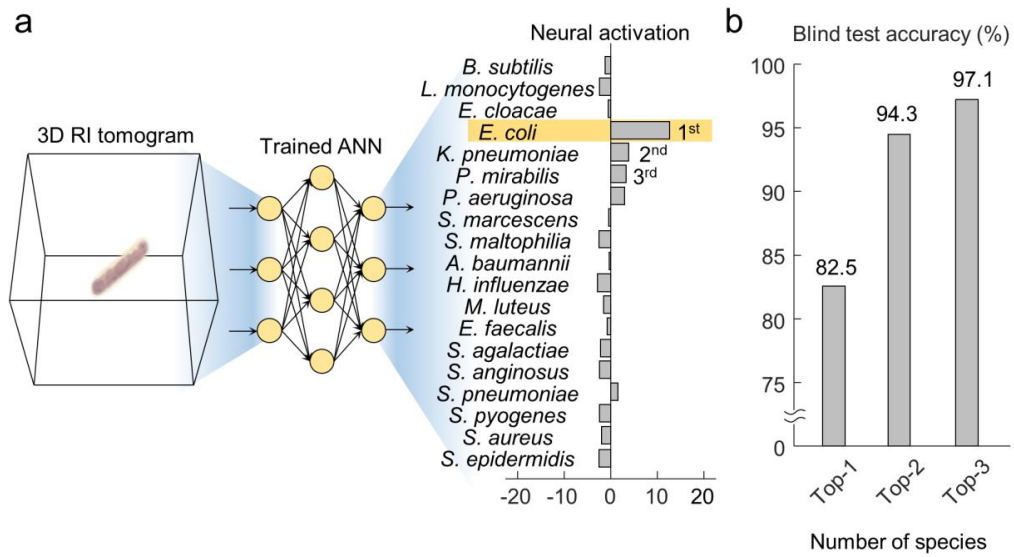

536

537 **Fig. 4. Identification of an individual three-dimensional (3D) refractive index (RI) tomogram using the**  
538 **artificial neural network (ANN).**

539 (A) The ANN model processes the given 3D RI tomogram and results in a neural activation profile, which  
540 represent the similarity in the space of features extracted by the ANN. (B) The resulting neural activation allows  
541 the accurate narrowing down of possible species and the selection of the single most likely species.

542

543

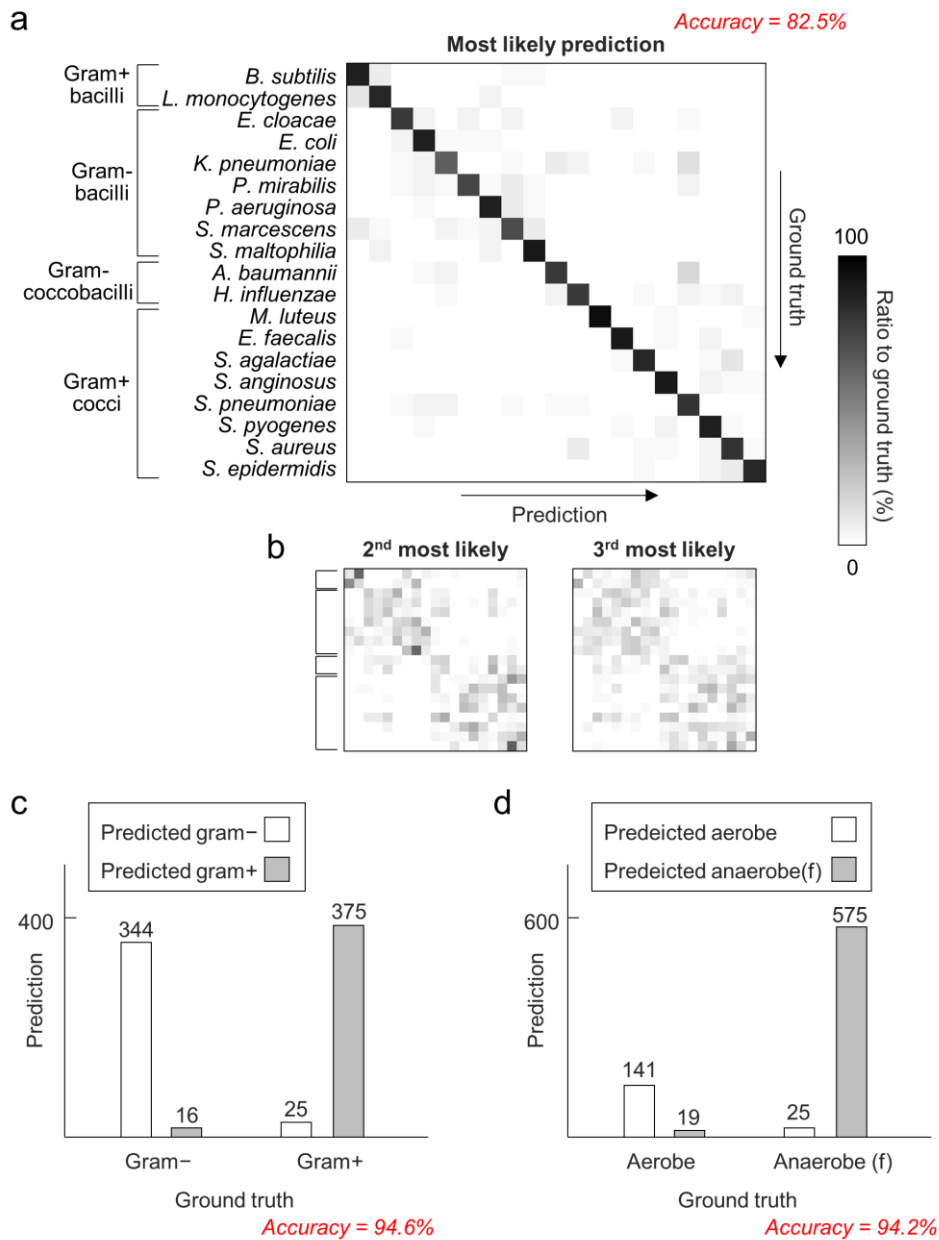

544

545 **Fig. 5. Distribution of error in species identification based on a single tomogram.**

546 (A) The confusion matrix visualizes the overall performance of the entire blind test dataset. The row and column  
 547 indices correspond to the ground truth and the prediction, respectively. The indices of the 19 species are ordered  
 548 to reflect the common bacterial categories. (B) The distribution of the second and the third most likely species  
 549 further visualizes the interspecific similarity recognized by the trained artificial neural network (ANN). (C), (D)  
 550 Individual tomograms are categorized under broader groups including gram-stainability and respiratory  
 551 metabolism using a modified ANN for each task.

552

553

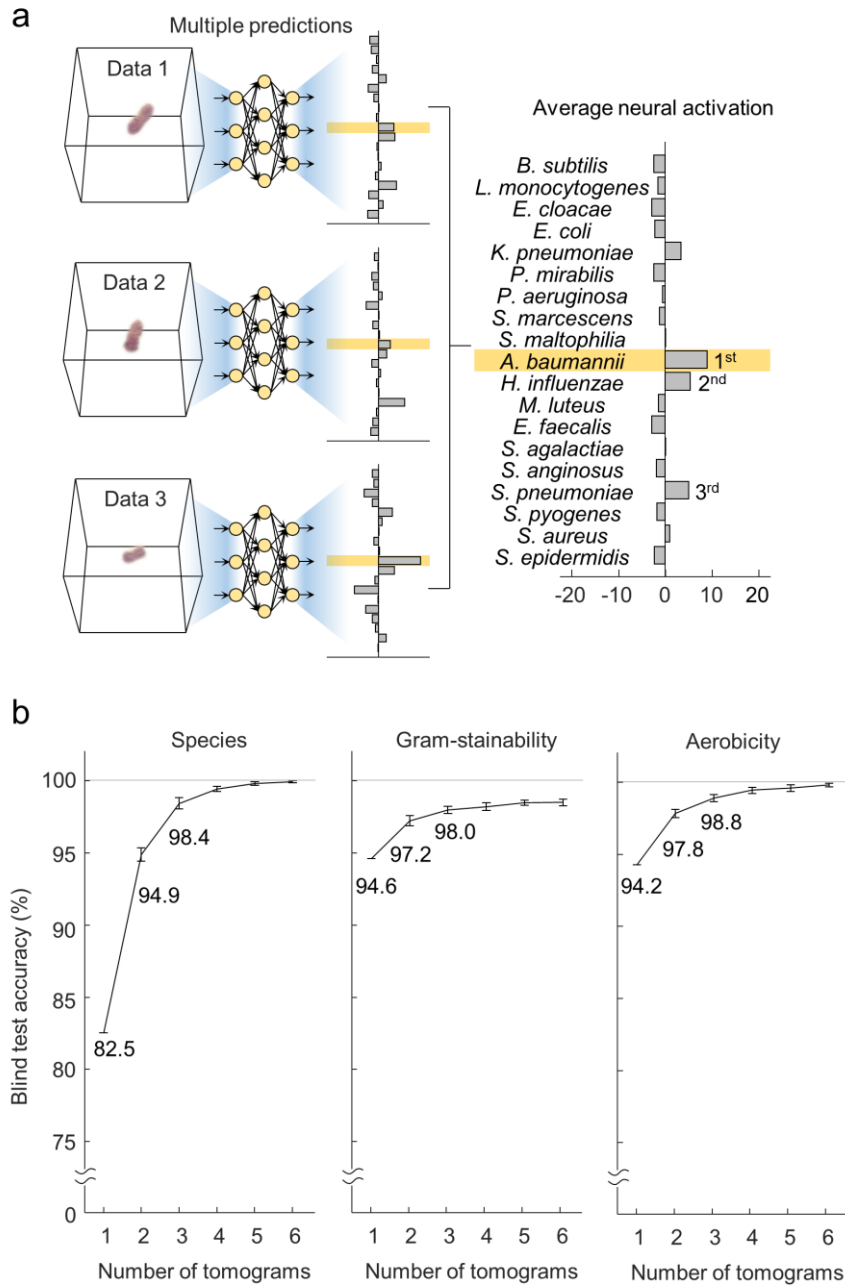

554

555 **Fig. 6. Increase in identification accuracy with multiple measurements**

556 (A) A higher accuracy is obtained by taking the average of the neural activation resulting from multiple three-  
557 dimensional refractive index tomograms of an identical species. (B) The reduction of error is sharper than a simple  
558 reciprocal function owing to the feature-extracting ability of the artificial neural network.

559

560

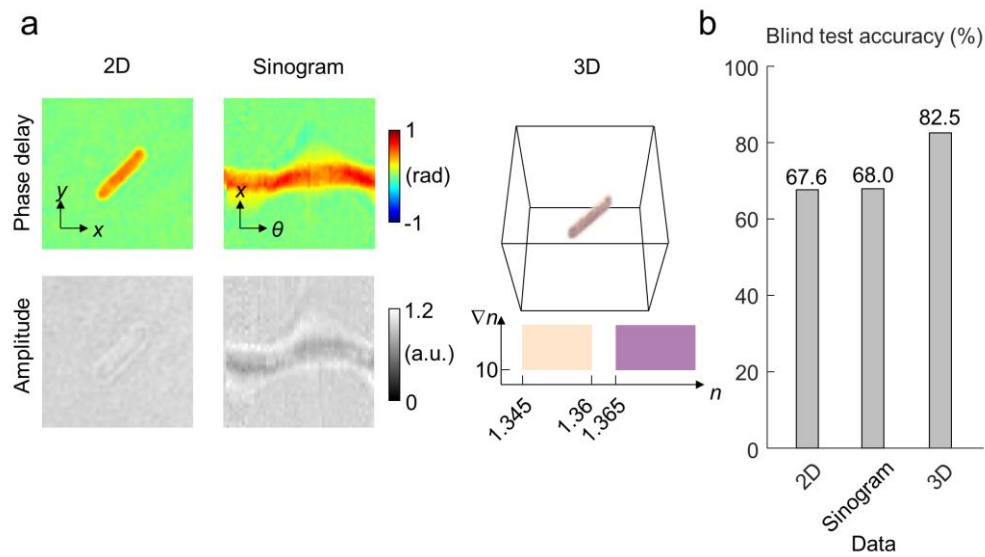

561

562 **Fig. A.1. Comparison between three-dimensional (3D) and two-dimensional (2D) quantitative phase**  
563 **imaging (QPI) in image-based species identification.**

564 (A) Three types of QPI data are compared in the task of image-based species identification. A 2D QPI data consists  
565 of light phase delay and amplitude in a perpendicular illumination angle. A sinogram of 2D QPI data consists of  
566 light phase delay and amplitude in 49 illumination angles. The 3D QPI data refers to the 3D refractive index  
567 tomogram acquired from the 2D QPI sinogram. (B) The 3D QPI outperforms the 2D QPI and sinogram by a  
568 significant margin.

569

570



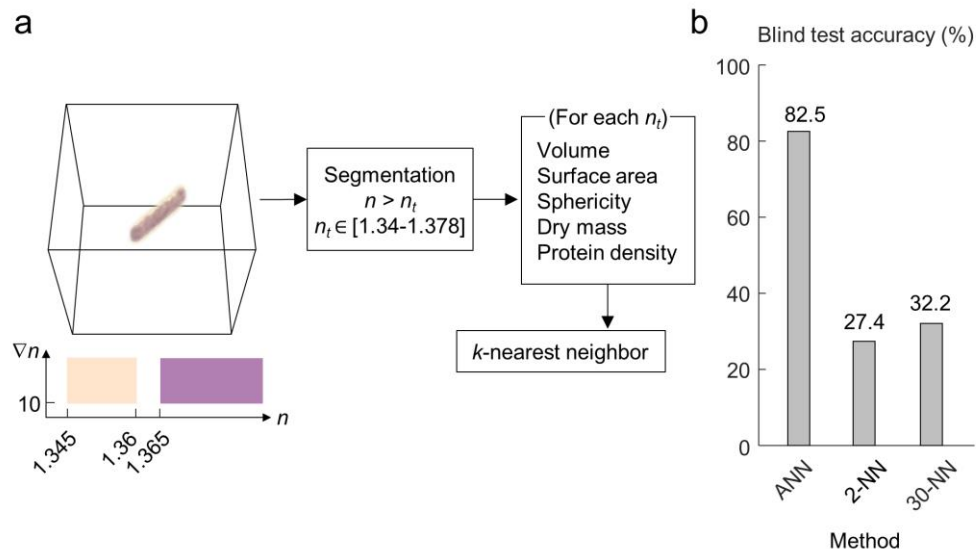

571

572 **Fig. A.2. Comparison between artificial neural network (ANN) and conventional machine learning in**  
573 **image-based species identification.**

574 (A) An alternative identification approach based on handcrafted features of the three-dimensional refractive index  
575 tomogram and  $k$ -nearest neighbor ( $k$ -NN) algorithm. (B) The identification accuracy is compared between the  
576 proposed ANN approach and the  $k$ -NN analysis of handcrafted features. ANN outperforms  $k$ -NN by a huge margin,  
577 in both the best-performing case ( $k=30$ ) and the worst-performing case ( $k=2$ ).

578

579

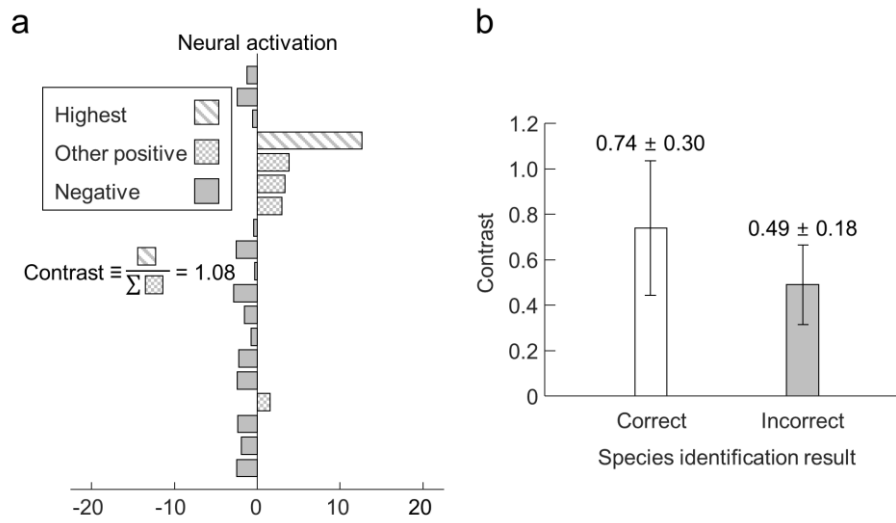

580

581 **Fig. A.3. Contrast of neural activation for correctly and incorrectly identified tomograms.**

582 (A) The contrast of neural activation is defined as the highest neural activation divided by the sum of other positive  
583 neural activation, in order to represent the exclusiveness of the identification. (B) Statistical comparison of the  
584 identification contrast between the correctly identified test data and the misidentified test data.

585
